# Supplementary material for: Paternal low protein diet perturbs inter-generational metabolic homeostasis in a tissue-specific manner in mice
Source: PubMed Central journal article supplement (PMC9458637; doi:10.1038/s42003-022-03914-8), 2022-09-08
Supplement: 42003_2022_3914_MOESM3_ESM.pdf [file 42003_2022_3914_MOESM3_ESM.pdf]

## Description of Additional Supplementary Files

**File name:** Supplementary Data 1

**Description:** F1 neonatal, adult and F2 neonatal body and organ weights and ELSIA/Assay tissue data

**File name:** Supplementary Data 2

**Description:** F1 neonatal offspring tissue lipidomic abundance

**File name:** Supplementary Data 3

**Description:** F1 adult offspring tissue lipidomic abundance

**File name:** Supplementary Data 4

**Description:** F1 adult offspring liver transcriptomic data

**File name:** Supplementary Data 5

**Description:** F1 adult male offspring liver transcriptomic data

**File name:** Supplementary Data 6

**Description:** F1 adult female offspring liver transcriptomic data

**File name:** Supplementary Data 7

**Description:** Adult liver Gene Ontology and Pathway output data

**File name:** Supplementary Data 8

**Description:** F1 adult fecal 16S sequencing data

**File name:** Supplementary Data 9

**Description:** F2 neonatal offspring tissue lipidomic abundance
